# Supplementary material
Source: publisher site journal article supplement (https://www.dovepress.com/article/351599)
Supplement: Supplementary file 1 [file get_supplementary_file.php]

**Supplementary materials**

**Supplementary Table 1: Comparative haematology results according to SCD Genotype**

|  |  | **HU+** | | |  | **HU-** | | | |
| --- | --- | --- | --- | --- | --- | --- | --- | --- | --- |
| **Parameter** | | **HbSS (N=61)** | **HbSC (N=3)** | **P value** |  |  | **HbSS (N=34)** | **HbSC (N=11)** | **P value** |
| **Mean ± SD** | **Mean ± SD** |  |  | **Mean ± SD** | **Mean ± SD** |
| Age (years) |  | 8.17 ± 2.92 | 6.67 ± 2.08 | 0.383 |  |  | 7.1 ± 3.6 | 10.3 ± 2.4 | 0.002 |
| Weight (kg) |  | 25.48 ± 7.89 | 25.17 ± 9.31 | 0.947 |  |  | 22.69 ± 6.77 | 29.45 ± 6.28 | 0.006 |
| Height (cm) |  | 129.55 ± 16.06 | 126.56 ± 15.40 | 0.755 |  |  | 118.09 ± 23.51 | 138.22 ± 12.82 | 0.011 |
| **Haematology** | | | | |  |  | | | |
| Hb (g/dL) | | 8.34 ± 1.95 | 10.83 ± 1.36 | 0.033 |  |  | 8.32 ± 1.39 | 10.20 ± 1.20 | 0.0003 |
| HbF (%) | | 15.67 ± 11.40 | 2.50 ± 3.01 | 0.015* |  |  | 9.96 ± 8.25 | 6.25 ± 4.76 | 0.245* |
| RBC (x10^12/L) | | 2.61 ± 0.63 | 3.53 ± 0.80 | 0.016 |  |  | 2.98 ± 0.71 | 3.83 ± 0.57 | 0.001 |
| WBC (x10^9/L) | | 9.97 ± 3.51 | 6.37 ± 1.67 | 0.084 |  |  | 12.41 ± 3.98 | 8.21 ± 2.78 | 0.003 |
| MCH (pg) | | 32.91 ± 4.58 | 30.97 ± 3.20 | 0.473 |  |  | 28.58 ± 3.37 | 26.38 ± 1.85 | 0.055 |
| MCV (fL) | | 92.18 ± 10.19 | 85.40 ± 8.16 | 0.263 |  |  | 79.69 ± 7.81 | 73.47 ± 4.56 | 0.021 |
| PLT (10^9/L) | | 340.41 ± 113.90 | 242.33 ± 54.24 | 0.146 |  |  | 386.23± 114.80 | 332.80 ± 113.75 | 0.2 |
| HCT (%) | | 24.20 ± 4.31 | 29.77 ± 3.90 | 0.033 |  |  | 23.37 ± 3.96 | 28.04 ± 3.38 | 0.002 |

***Mann Whitney U test HU+ = Hydroxyurea treated population HU- = Population with no history of hydroxyurea**

**Supplementary Table 2: HbF concentration in the studied genotypes**

|  |  |  |  |  |  |  |  |  |
| --- | --- | --- | --- | --- | --- | --- | --- | --- |
| **SNP** | **GENOTYPE** | **HU+** | | |  | **HU-** | | |
| **N** | **Mean HbF** | **P value** |  | **N** | **Mean HbF** | **P value** |
| rs11886868 | Homozygous (CC) | 41 | 15.36 ±13.39 |  |  | 23 | 8.33±6.45 |  |
|  | Heterozygous (CT) | 20 | 13.94 ±7.14 |  |  | 20 | 8.51±7.64 |  |
|  | Homozygous mutant (TT) | 1 | 21.60 |  |  | 1 | 13.90 |  |
| P value |  |  |  | 0.772 |  |  |  | 0.741 |
| rs6706648 | Homozygous (CC) | 21 | 19.43 ±13.46 |  |  | 6 | 9.12±4.08 |  |
|  | Heterozygous (CT) | 28 | 12.45 ±11.13 |  |  | 28 | 8.23 ±6.72 |  |
|  | Homozygous mutant (TT) | 13 | 13.36 ±1.19 |  |  | 10 | 10.85 ±11.60 |  |
|  |  |  |  | 0.095 |  |  |  | 0.663 |
| rs7606173 | Homozygous (CC) | 38 | 14.05 ±13.10 |  |  | 35 | 9.19 ±7.40 |  |
|  | Heterozygous (CG) | 23 | 16.45 ±8.97 |  |  | 8 | 9.24 ±9.91 |  |
|  | Homozygous mutant (GG) | 1 | 18.00 |  |  | 2 | 5.90 ±4.10 |  |
|  |  |  |  | 0.717 |  |  |  | 0.844 |
| xmn1 | Homozygous (CC) | 39 | 14.88 ±10.63 |  |  | 27 | 9.94 ±7.89 |  |
|  | Heterozygous (CT) | 23 | 15.22 ±13.35 | 0.912 |  | 18 | 7.73 ±7.35 |  |
|  |  |  |  |  |  |  |  | 0.349 |

**The p-values were obtained by one-way analysis of variance (Anova). HbF is presented as mean ±SD**

**Supplementary Table 3: Association between each SNP and HbF levels for HU+ and HU- populations**

|  |  | **HbF** | | | | | | |
| --- | --- | --- | --- | --- | --- | --- | --- | --- |
|  |  | **HU+ Patients** | | |  | **HU- Patients** | | |
| **SNP** |  | **β** | **R2** | **Model p-value** |  | **β** | **R2** | **Model p-value** |
| rs11886868 | | 0.124 | 0.016 | 0.321 |  | 0.092 | 0.011 | 0.493 |
| rs6706648 | | -0.117 | 0.030 | 0.180 |  | -0.099 | 0.015 | 0.432 |
| rs7606173 | | 0.184 | 0.038 | 0.129 |  | -0.003 | 0.000 | 0.984 |
| xmn1 |  | -0.099 | 0.009 | 0.455 |  | -0.051 | 0.003 | 0.734 |
